# Supplementary material for: ‘Metal Complexes as Ligands’ for the Synthesis of Coordination Polymers: A MnIII Monomer as a Building Block for the Preparation of an Unprecedented 1-D {MnIIMnIII}n Linear Chain
Source: MDPI journal article supplement (doi:10.3390/ma13061352), 2020-03-17
Supplement: s1 [file s1]

# Supplementary Materials: ‘Metal Complexes as Ligands’ for the Synthesis of Coordination Polymers: A Mn<sup>III</sup> Monomer as a Building Block for the Preparation of an Unprecedented 1-D {Mn<sup>II</sup>Mn<sup>III</sup>}<sub>n</sub> Linear Chain

Konstantinos N. Pantelis, Georgios Karotsis, Christos Lampropoulos, Luís Cunha-Silva, Albert Escuer and Theocharis C. Stamatatos

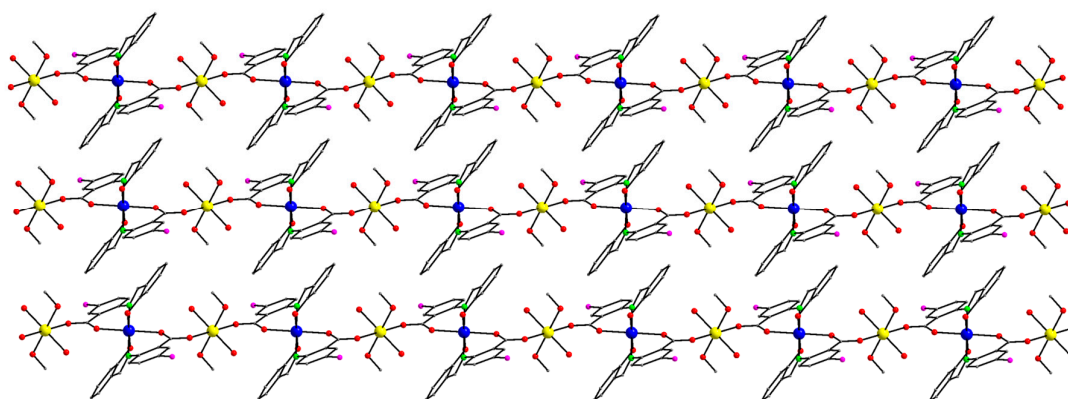

**Figure S1.** Parallel arrangement of adjacent 1-D linear chains of **2** along the *c*-axis. Color scheme: Mn<sup>III</sup>, blue; Mn<sup>II</sup>, yellow; Cl, purple; O, red; N, green; C, gray. H atoms are omitted for clarity.

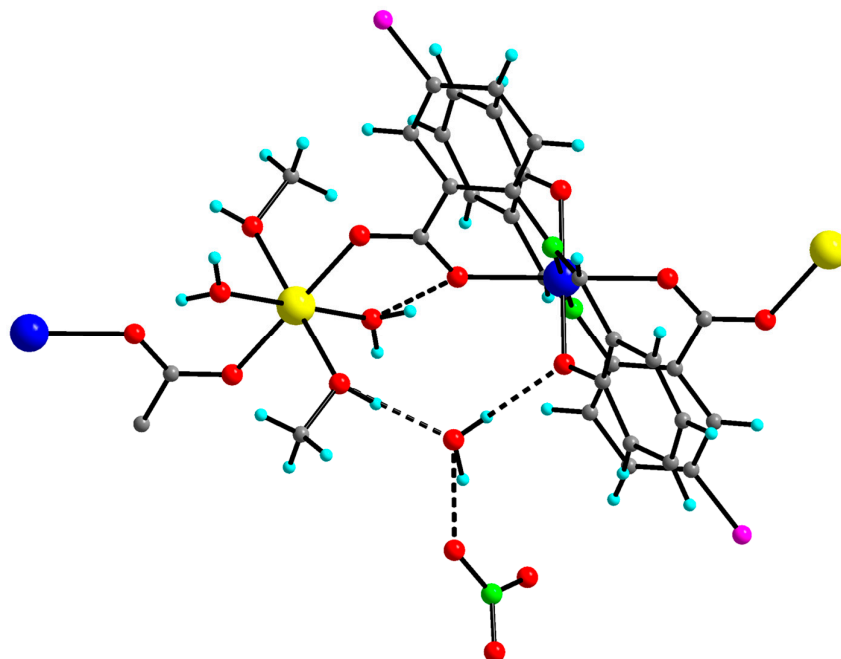

**Figure S2.** A small section of the 1-D chain of 2:2H<sub>2</sub>O, emphasizing with dashed lines the intra-chain H-bonding interactions which are discussed in the text. Color scheme as in Figure S1; H atoms are shown in cyan.

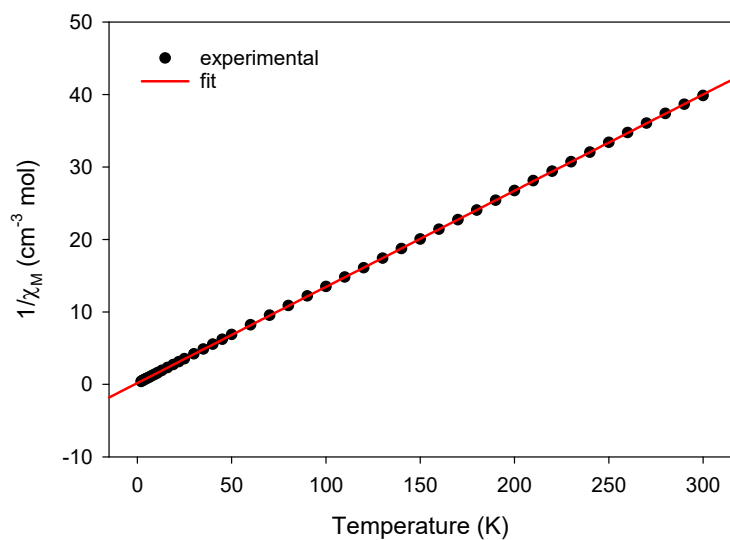

**Figure S3.** Plot of  $1/\chi_M$  versus  $T$  for complex 2. The solid red line is the fit of the data to the Curie-Weiss law; see the text for the corresponding fit parameters.

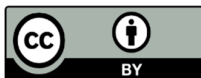

© 2020 by the authors. Submitted for possible open access publication under the terms and conditions of the Creative Commons Attribution (CC BY) license (<http://creativecommons.org/licenses/by/4.0/>).
